# Supplementary material
Source: Springer Nature journal article supplement (https://www.springermedizin.de/resource/supplementary/12931_2013_1469_MOESM1_ESM.pdf/9426254)
Supplement: MOESM1 [file 9426254]

Supplementary Table 1. List of antibody used in this study.

| Number | Name                                                                | Company                   | Cat No   |
|--------|---------------------------------------------------------------------|---------------------------|----------|
| 1      | Phospho-S6 Ribosomal Protein (Ser235/236) (D57.2.2E) XP® Rabbit mAb | Cell Signaling Technology | 4858S    |
| 2      | S6 Ribosomal Protein (5G10) Rabbit mAb                              | Cell Signaling Technology | 2217S    |
| 3      | Akt (pan) (C67E7) Rabbit mAb                                        | Cell Signaling Technology | 4691S    |
| 4      | Phospho-Akt (Ser473) (D9E) XP® Rabbit mAb                           | Cell Signaling Technology | 4060S    |
| 5      | Tuberin/TSC2 (D93F12) XP® Rabbit mAb                                | Cell Signaling Technology | 4308S    |
| 6      | Rictor (53A2) Rabbit mAb                                            | Cell Signaling Technology | 2114S    |
| 7      | Raptor (24C12) Rabbit mAb                                           | Cell Signaling Technology | 2280S    |
| 8      | β-Catenin (6B3) Rabbit mAb                                          | Cell Signaling Technology | 9582S    |
| 9      | Pan-Cadherin (28E12) Rabbit mAb                                     | Cell Signaling Technology | 4073S    |
| 10     | E-Cadherin (24E10) Rabbit mAb                                       | Cell Signaling Technology | 3195S    |
| 11     | β-Actin Antibody                                                    | Cell Signaling Technology | 4967L    |
| 12     | Vimentin (D21H3) XP® Rabbit mAb                                     | Cell Signaling Technology | 5741S    |
| 13     | GSK3-Beta(27C10)                                                    | Cell Signaling Technology | 9315     |
| 14     | phospho-GSK3beta(Ser9)                                              | Cell Signaling Technology | 9336S    |
| 15     | Catenin delta-1 antibody                                            | Cell Signaling Technology | 4989S    |
| 16     | alpha-E-Catenin (23B2) Rabbit mAb                                   | Cell Signaling Technology | 3240S    |
| 17     | N-Cadherin Rabbit Ab                                                | Cell Signaling Technology | 4061P    |
| 18     | E-cadherin (67A4)                                                   | Santa Cruz Biotech        | sc-21791 |
| 19     | ant-SMA antibody                                                    | sigma                     | 4795     |
| 20     | Alexa-Fluor 488 goat anti-mouse IgG (H+L)                           | Invitrogen                | A11001   |
| 21     | Alexa-Fluor 633 goat anti-mouse IgG (H+L)                           | Invitrogen                | A21052   |
